# Supplementary material for: GIV/Girdin, a non-receptor modulator for Gαi/s, regulates spatiotemporal signaling during sperm capacitation and is required for male fertility
Source: eLife. 2021 Aug 19;10:e69160. doi: 10.7554/eLife.69160 (PMC8376251; doi:10.7554/eLife.69160)
Supplement: Figure 1—source data 1. — Excel sheet with band densitometry values of immunoblots for endogenous GIV in various tissue lysates using three different anti-GIV/Girdin antibodies, as determined by ImageJ (corresponds to Figure 1A). [file elife-69160-fig1-data1.xlsx]

## Sheet: Sheet1
			APE-C- tissue		APE-N1		APE-N2		Avge	std dev
		Liver	4.913		5.274		31.104		13.7637	15.0183
		Lung	44.108		89.898		67.893		67.2997	22.9008
		Brain	92.314		138.274		95.752		108.78	25.6003
		Kidney	17.227		11.92		10.026		13.0577	3.73287
		Testes	98.589		93.03		72.059		87.8927	13.9912
		Heart	20.195		30.843		32.978		28.0053	6.84767
		Spleen	41.604		31.274		51.035		41.3043	9.88391
		Skeletal Muscle	12.881		5.407		11.352		9.88	3.94845
		Fat	13.361		64.757		73.089		50.4023	32.3481
