# Supplementary material for: GIV/Girdin, a non-receptor modulator for Gαi/s, regulates spatiotemporal signaling during sperm capacitation and is required for male fertility
Source: eLife. 2021 Aug 19;10:e69160. doi: 10.7554/eLife.69160 (PMC8376251; doi:10.7554/eLife.69160)
Supplement: Figure 5—figure supplement 1—source data 1. [file elife-69160-fig5-figsupp1-data1.xlsx]

## Sheet: Sheet1
			Testicle weight (g)
			WT	c-KO
			0.12	0.12
			0.14	0.1
			0.15	0.13
			0.12	0.15
			0.12	0.06
			0.13	0.12
			0.13	0.12
			0.12	0.12
			0.13	0.13
				0.1
