# Supplementary material for: GIV/Girdin, a non-receptor modulator for Gαi/s, regulates spatiotemporal signaling during sperm capacitation and is required for male fertility
Source: eLife. 2021 Aug 19;10:e69160. doi: 10.7554/eLife.69160 (PMC8376251; doi:10.7554/eLife.69160)
Supplement: Figure 5—figure supplement 1—source data 2. [file elife-69160-fig5-figsupp1-data2.xlsx]

## Sheet: Sheet1
		Testicle length (cm)
		WT	c-KO
		0.8	0.8
		0.7	0.8
		0.8	0.8
		0.8	0.9
		0.8	0.8
		0.8	0.8
		0.8	0.7
		0.85	0.75
		0.8	0.7
			0.65
