# Supplementary material for: GIV/Girdin, a non-receptor modulator for Gαi/s, regulates spatiotemporal signaling during sperm capacitation and is required for male fertility
Source: eLife. 2021 Aug 19;10:e69160. doi: 10.7554/eLife.69160 (PMC8376251; doi:10.7554/eLife.69160)
Supplement: Figure 5—source data 2. [file elife-69160-fig5-data2.xlsx]

## Sheet: Sheet1
				Time to live birth values observed in females co-housed with WT and GIV-cKO mice (Days)
				Days
				WT	GIV-cKO
			1	27	20
			2	27	20
			3	27	23
			4	28	28
			5	28	28
			6	28	39
			7	28	51
			8	29	90
			9	31	90
			10	33	90
			11	37	90
