# Supplementary material for: GIV/Girdin, a non-receptor modulator for Gαi/s, regulates spatiotemporal signaling during sperm capacitation and is required for male fertility
Source: eLife. 2021 Aug 19;10:e69160. doi: 10.7554/eLife.69160 (PMC8376251; doi:10.7554/eLife.69160)
Supplement: Figure 5—source data 3. [file elife-69160-fig5-data3.xlsx]

## Sheet: Sheet1
		Average litter size values from WT and GIV-cKO mice
		WT males	# of pups	Average pups		KO Males	# of pups	ave pups
		1	23	7.66667		1	8	2.66667
		2	28	9.33333		2	9	3
		3	10	5		3	0	0
		4	22	7.33333		4	14	4.66667
						5	3	1
