# Supplementary material for: GIV/Girdin, a non-receptor modulator for Gαi/s, regulates spatiotemporal signaling during sperm capacitation and is required for male fertility
Source: eLife. 2021 Aug 19;10:e69160. doi: 10.7554/eLife.69160 (PMC8376251; doi:10.7554/eLife.69160)
Supplement: Figure 5—source data 4. [file elife-69160-fig5-data4.xlsx]

## Sheet: Sheet1
					sperm count (10 e-6)
			WT
			1		16.86
			2		18.49
			3		17.44
			4		18.12
			KO
			1		15.69
			2		19.17
			3		18.66
			4		17.73
			5		17.96
