# Supplementary material for: GIV/Girdin, a non-receptor modulator for Gαi/s, regulates spatiotemporal signaling during sperm capacitation and is required for male fertility
Source: eLife. 2021 Aug 19;10:e69160. doi: 10.7554/eLife.69160 (PMC8376251; doi:10.7554/eLife.69160)
Supplement: Figure 5—source data 5. [file elife-69160-fig5-data5.xlsx]

## Sheet: Sheet1
		Genes UP in KO compared to WT
										Genes DOWN in KO compared to WT
		ID	Diff	-log10(p)	n1	n2	Name			ID	Diff	-log10(p)	n1	n2	Name
		ENSMUSG00000092851	3.17	2.24	3	4	Gm25960			ENSMUSG00000093341	-1.13	1.29	3	4	Gm26116
		ENSMUSG00000019768	2.7	1.91	3	4	Esr1			ENSMUSG00000064330	-1.15	4.59	3	4	Pde6h
		ENSMUSG00000088139	2.69	4.59	3	4	Gm27343			ENSMUSG00000060032	-1.17	1.81	3	4	H2afj
		ENSMUSG00000084859	2.33	2.01	3	4	1700080N15Rik			ENSMUSG00000102126	-1.24	1.96	3	4	Gm29143
		ENSMUSG00000093933	2.31	2.32	3	4	Gm25526			ENSMUSG00000106147	-1.26	1.73	3	4	Rnu3a
		ENSMUSG00000096841	2.17	1.6	3	4	Gm25596			ENSMUSG00000099021	-1.29	1.41	3	4	Rn7s1
		ENSMUSG00000080678	2	2.14	3	4	Gm23334			ENSMUSG00000099250	-1.29	1.41	3	4	Rn7s2
		ENSMUSG00000077283	1.84	1.44	3	4	n-R5s158			ENSMUSG00000077359	-1.35	1.41	3	4	Gm25308
		ENSMUSG00000064580	1.83	1.98	3	4	Gm25134			ENSMUSG00000092837	-1.37	1.92	3	4	Rpph1
		ENSMUSG00000098594	1.8	1.69	3	4	Gm27628			ENSMUSG00000115308	-1.51	2.68	3	4	Gm48944
		ENSMUSG00000098957	1.77	2.64	3	4	Mir8105			ENSMUSG00000095892	-1.61	2.78	3	4	Rnu5g
		ENSMUSG00000088608	1.71	2.52	3	4	Gm24186			ENSMUSG00000088982	-1.84	1.34	3	4	Gm25600
		ENSMUSG00000090485	1.62	2.02	3	4	Gm17416			ENSMUSG00000080671	-1.93	1.56	3	4	Gm23335
		ENSMUSG00000088973	1.61	1.33	3	4	Gm23762			ENSMUSG00000087823	-1.94	2.25	3	4	Gm22281
		ENSMUSG00000099610	1.56	1.92	3	4	Gm37545			ENSMUSG00000105790	-1.97	1.91	3	4	Gm24105
		ENSMUSG00000087721	1.51	2.68	3	4	Gm26280			ENSMUSG00000104840	-2.06	1.35	3	4	Mir7230
		ENSMUSG00000021908	1.49	1.79	3	4	Gm6768			ENSMUSG00000093173	-2.12	1.41	3	4	Gm23872
		ENSMUSG00000059412	1.43	2.36	3	4	Fxyd2			ENSMUSG00000025002	-2.15	1.66	3	4	Cyp2c55
		ENSMUSG00000100761	1.41	4.59	3	4	Gm29344			ENSMUSG00000067274	-2.16	4.59	3	4	Rplp0
		ENSMUSG00000113437	1.38	1.58	3	4	Gm47412			ENSMUSG00000079299	-3.99	2.84	3	4	Klrb1
		ENSMUSG00000097906	1.21	4.24	3	4	Gm9625			ENSMUSG00000076355	-4.46	2.63	3	4	Gm27509
		ENSMUSG00000083708	1.18	2.7	3	4	Gm13123
		ENSMUSG00000063696	1.16	4.59	3	4	Gm8730
		ENSMUSG00000101990	1.13	2.2	3	4	Gm20856
		ENSMUSG00000025020	1.13	1.95	3	4	Slit1
		ENSMUSG00000085724	1.12	1.35	3	4	Gm13096
		ENSMUSG00000083832	1.09	2.06	3	4	Gm13771
		ENSMUSG00000102085	1.03	1.73	3	4	4930435C17Rik
		ENSMUSG00000086916	1	1.36	3	4	Gm15903
		ENSMUSG00000089790	0.983	1.72	3	4	Gm16588
		Pathways UP in KO compared to WT								Pathways DOWNregulated in KO compared to WT
										Name	pValue	FDR
		Name	pValue	FDR						Gene and protein expression by JAK-STAT signaling after Interleukin-12 stimulation	0.00531783	0.161005
		TFAP2 (AP-2) family regulates transcription of growth factors and their receptors	0.0010433	0.0285554						Interleukin-12 signaling	0.00697175	0.161005
		Constitutive Signaling by Aberrant PI3K in Cancer	0.00173302	0.0285554						Interleukin-12 family signaling	0.0090081	0.161005
		Extra-nuclear estrogen signaling	0.00192497	0.0285554						Packaging Of Telomere Ends	0.0495983	0.161005
		PI5P, PP2A and IER3 Regulate PI3K/AKT Signaling	0.00301633	0.0285554						RNA Polymerase I Promoter Opening	0.0495983	0.161005
		Negative regulation of the PI3K/AKT network	0.00356942	0.0285554
		PI3K/AKT Signaling in Cancer	0.00356942	0.0285554
		Transcriptional regulation by the AP-2 (TFAP2) family of transcription factors	0.00612584	0.0428809
		Regulation of cortical dendrite branching	0.00892791	0.0535674
		ESR-mediated signaling	0.0194533	0.0887
		RUNX1 regulates transcription of genes involved in WNT signaling	0.0199791	0.0887
		RUNX1 regulates estrogen receptor mediated transcription	0.022175	0.0887
		Regulation of commissural axon pathfinding by SLIT and ROBO	0.0265524	0.102712
		PIP3 activates AKT signaling	0.0342373	0.102712
		Intracellular signaling by second messengers	0.0481935	0.144581
