# Supplementary material for: GIV/Girdin, a non-receptor modulator for Gαi/s, regulates spatiotemporal signaling during sperm capacitation and is required for male fertility
Source: eLife. 2021 Aug 19;10:e69160. doi: 10.7554/eLife.69160 (PMC8376251; doi:10.7554/eLife.69160)
Supplement: Figure 6—source data 4. [file elife-69160-fig6-data4.xlsx]

## Sheet: % motile
	% motile		Run 1			Run 2			Run 3
	PBS Non Cap		0.003	0.0041		0.0017	0.0051		0.0026	0.0043
	PBS Cap		0.237	0.259		0.198	0.229		0.252	0.216
	GIV-WT TAT Non Cap		0.161	0.184		0.173	0.159		0.192	0.171
	GIV-WT TAT Cap		0.274	0.289		0.314	0.296		0.247	0.255
	GIV-FA TAT Non Cap		0.075	0.081		0.067	0.072		0.619	0.0521
	GIV-FA TAT Cap		0.181	0.172		0.219	0.197		0.194	0.208

## Sheet: % progressive
	% progressive		Run 1			Run 2			Run 3
	PBS Non Cap		0	0		0	0		0	0
	PBS Cap		0.029	0.037		0.034	0.039		0.028	0.035
	GIV-WT TAT Non Cap		0.012	0.0094		0.013	0.011		0.0096	0.01
	GIV-WT TAT Cap		0.033	0.031		0.0294	0.0348		0.0299	0.0371
	GIV-FA TAT Non Cap		0	0		0	0		0	0
	GIV-FA TAT Cap		0.023	0.019		0.017	0.024		0.016	0.021
