# Supplementary material for: GIV/Girdin, a non-receptor modulator for Gαi/s, regulates spatiotemporal signaling during sperm capacitation and is required for male fertility
Source: eLife. 2021 Aug 19;10:e69160. doi: 10.7554/eLife.69160 (PMC8376251; doi:10.7554/eLife.69160)
Supplement: Figure 6—source data 5. [file elife-69160-fig6-data5.xlsx]

## Sheet: % survival
				*hours post capacitation
	Absorbance 550 nm		Run 1					Run 2					Run 3
			t0	t1h	t4h	t6h		t0	t1h	t4h	t6h		t0	t1h	t4h	t6h
	PBS Non Cap		0.782	0.659	0.627	0.484		0.661	0.631	0.592	0.459		0.64	0.683	0.562	0.377
	PBS Cap		0.882	0.812	0.643	0.323		0.697	0.72	0.531	0.293		0.789	0.729	0.492	0.319
	GIV-WT TAT Non Cap		0.81	0.758	0.766	0.644		0.83	0.793	0.698	0.653		0.761	0.725	0.704	0.633
	GIV-WT TAT Cap		0.92	0.916	0.869	0.782		0.84	0.831	0.799	0.724		0.832	0.825	0.819	0.772
	GIV-FA TAT Non Cap		0.794	0.753	0.611	0.497		0.71	0.593	0.475	0.377		0.81	0.639	0.562	0.418
	GIV-FA TAT Cap		0.863	0.722	0.549	0.293		0.78	0.621	0.592	0.313		0.6	0.614	0.559	0.343
			* can be plotted as % death if normalized to internal t0 controls
