# Supplementary material for: GIV/Girdin, a non-receptor modulator for Gαi/s, regulates spatiotemporal signaling during sperm capacitation and is required for male fertility
Source: eLife. 2021 Aug 19;10:e69160. doi: 10.7554/eLife.69160 (PMC8376251; doi:10.7554/eLife.69160)
Supplement: Figure 7—source data 1. [file elife-69160-fig7-data1.xlsx]

## Sheet: Sheet1
	fmol/10^6 sperms				set 1	fold change			set 2	fold change			set 3	fold change
		Contol PBS			147	1			159	1			133	1
		HCO3-			329	2.2381			372	2.33962			426	3.20301
		IBMX+HCO3			627	4.26531			819	5.15094			712	5.35338
		IBMX+ Adenosine+HCO3			421	2.86395			399	2.50943			289	2.17293
		Progesterone+HCO3			712	4.84354			892	5.61006			773	5.81203
	fmol/10^6 sperms				set 1	fold change			set 2	fold change			set 3	fold change
		Contol PBS			144	1			183	1			152	1
	25 mM	HCO3-			397	2.75694			422	2.30601			401	2.63816
			WT		258	1.79167			269	1.46995			332	2.18421
			FA		372	2.58333			381	2.08197			369	2.42763
	0.5 mM	IBMX+HCO3			701	4.86806			811	4.43169			793	5.21711
			WT		439	3.04861			629	3.43716			567	3.73026
			FA		655	4.54861			796	4.34973			802	5.27632
	0.1 mM	Adenosine+HCO3			325	2.25694			379	2.07104			347	2.28289
			WT		197	1.36806			267	1.45902			227	1.49342
			FA		346	2.40278			410	2.24044			361	2.375
	100 uM/L	Progesterone+HCO3			829	5.75694			829	4.53005			788	5.18421
			WT		369	2.5625			338	1.84699			377	2.48026
			FA		728	5.05556			796	4.34973			693	4.55921
