# Supplementary material for: GIV/Girdin, a non-receptor modulator for Gαi/s, regulates spatiotemporal signaling during sperm capacitation and is required for male fertility
Source: eLife. 2021 Aug 19;10:e69160. doi: 10.7554/eLife.69160 (PMC8376251; doi:10.7554/eLife.69160)
Supplement: Figure 7—source data 2. [file elife-69160-fig7-data2.xlsx]

## Sheet: Controls
	Mango sperm' % acrosome reacted
			DMSO		A23186		Progesterone
		set 1	42.31		75.77		61.18
			41.79		72.9		63.29
		set 2	45.16		79.92		66.14
			39.92		81.08		59.38
		set 3	38.71		81.37		65.91
			46.22		78.61		64.27

## Sheet: TAT-GIV treatment
	Mango sperm' % acrosome intact (EGFP positive; Inclusive PI-negative gate)
				set 1		set 2		set 3
		PBS-DMSO		18.79		18.91		20.12
		PBS-Prog		21.26		17.63		19.79
		TAT-GIV-WT-DMSO		25.39		27.96		25.16
		TAT-GIV-WT-Prog		55.91		48.84		59.72
		TAT-GIV-FA-DMSO		29.18		22.68		21.93
		TAT-GIV-FA-Prog		17.29		18.62		21.59
			* we should plot the values that are % acrosome reacted (meaning, 100 - values above)

## Sheet: Degree of AR
			* only red columns to be plotted as stacked bar plots that are all equal to 100%
	CD46 staining (Acrosome)
set 1
		total		Non-reacted	%	Partially AR	%	Complete AR	%
PBS-DMSO		237		234	98.7342	3	1.26582	0	0
PBS-A23186		255		188	73.7255	43	16.8627	24	9.41176
PBS-Prog		322		219	68.0124	77	23.913	26	8.07453
TAT-GIV-WT-DMSO		300		299	99.6667	1	0.333333	0	0
TAT-GIV-WT-A23186		302		271	89.7351	18	5.96026	13	4.30464
TAT-GIV-WT-prog		290		258	88.9655	21	7.24138	11	3.7931
TAT-GIV-FA-DMSO		246		214	86.9919	25	10.1626	7	2.84553
TAT-GIV-FA-A23186		240		167	69.5833	32	13.3333	41	17.0833
TAT-GIV-FA-Prog		261		199	76.2452	23	8.81226	39	14.9425
set 2
		total		Non-reacted	%	Partially AR	%	Complete AR	%
PBS-DMSO		107		106	99.0654	1	0.934579	0	0
PBS-A23186		127		92	72.4409	21	16.5354	14	11.0236
PBS-Prog		157		118	75.1592	27	17.1975	12	7.64331
TAT-GIV-WT-DMSO		196		196	100	0	0	0	0
TAT-GIV-WT-A23186		205		190	92.6829	9	4.39024	6	2.92683
TAT-GIV-WT-prog		197		179	90.8629	11	5.58376	7	3.5533
TAT-GIV-FA-DMSO		210		190	90.4762	15	7.14286	5	2.38095
TAT-GIV-FA-A23186		192		138	71.875	22	11.4583	32	16.6667
TAT-GIV-FA-Prog		186		145	77.957	13	6.98925	28	15.0538
set 3
		total		Non-reacted	%	Partially AR	%	Complete AR	%
PBS-DMSO		201		197	98.01	4	1.99005	0	0
PBS-A23186		261		191	73.1801	38	14.5594	32	12.2605
PBS-Prog		277		189	68.231	69	24.9097	19	6.85921
TAT-GIV-WT-DMSO		179		178	99.4413	1	0.558659	0	0
TAT-GIV-WT-A23186		272		247	90.8088	16	5.88235	9	3.30882
TAT-GIV-WT-prog		261		229	87.7395	19	7.27969	13	4.98084
TAT-GIV-FA-DMSO		235		211	89.7872	18	7.65957	6	2.55319
TAT-GIV-FA-A23186		231		155	67.0996	39	16.8831	37	16.0173
TAT-GIV-FA-Prog		238		179	75.2101	18	7.56303	41	17.2269
