# Supplementary material for: GIV/Girdin, a non-receptor modulator for Gαi/s, regulates spatiotemporal signaling during sperm capacitation and is required for male fertility
Source: eLife. 2021 Aug 19;10:e69160. doi: 10.7554/eLife.69160 (PMC8376251; doi:10.7554/eLife.69160)
Supplement: Figure 7—source data 3. [file elife-69160-fig7-data3.xlsx]

## Sheet: IVF
		mouse IVF
		set 1+2		2 cell state		1 cell		total counted		% fertilized
		PBS		11		39		50		22
		TAT-GIV-WT		18		49		67		26.8657
		TAT-GIV-FA		35		38		73		47.9452
		set 3		2 cell state		1 cell		total counted		% fertilized
		PBS		13		44		57		22.807
		TAT-GIV-WT		16		51		67		23.8806
		TAT-GIV-FA		42		38		80		52.5
		set 4		2 cell state		1 cell		total counted		% fertilized
		PBS		42		144		186		22.5806
		TAT-GIV-WT		32		121		153		20.915
		TAT-GIV-FA		68		66		134		50.7463
